# Supplementary material for: A Classification System Using Optical Coherence Tomography for X-linked Retinoschisis and Its Association with Genetic Variants
Source: Research Square preprint supplement (doi:10.21203/rs.3.rs-7363735/v1), 2025-09-01
Supplement: Supplementary file 1 [file a427e06e2159b36551df59b3.pdf]

**Supplementary Table S1. Distribution of OCT Types on *RS1* Variants.**

| Variants No. | Complementary DNA | Protein                               | Mutation type | 1A | 1B | 2 | 3 | 4 | 5A | 5B |
|--------------|-------------------|---------------------------------------|---------------|----|----|---|---|---|----|----|
| 1            | c.78+1G>T         | Splice_donor_variant & intron_variant | Truncated     | 1  | 1  | 0 | 0 | 0 | 0  | 0  |
| 2            | c.97delT          | p.Trp33fs                             | Truncated     | 2  | 0  | 0 | 0 | 0 | 0  | 0  |
| 3            | c.130_140del      | p.Gly44fs                             | Truncated     | 2  | 0  | 0 | 0 | 0 | 0  | 0  |
| 4            | c.150G>A          | p.Trp50* premature stop               | Truncated     | 2  | 0  | 0 | 0 | 0 | 0  | 0  |
| 5            | Exon 4 deletion   |                                       | Truncated     | 2  | 0  | 0 | 0 | 0 | 0  | 0  |
| 6            | c.306_308dupGCT   | p.Leu103dup                           | Truncated     | 0  | 2  | 0 | 0 | 0 | 0  | 0  |
| 7            | c.326+2T>G        | Splice_donor_variant & intron_variant | Truncated     | 0  | 1  | 0 | 0 | 0 | 0  | 1  |
| 8            | c.522+1G>T        | Splice_donor_variant & intron_variant | Truncated     | 2  | 0  | 0 | 0 | 0 | 0  | 0  |
| 9            | c.188G>A          | p.Cys63Tyr                            | Missense      | 0  | 0  | 0 | 0 | 2 | 0  | 0  |
| 10           | c.214G>A          | p.Glu72Lys                            | Missense      | 1  | 0  | 0 | 0 | 5 | 0  | 0  |
| 11           | c.286T>C          | p.Trp96Arg                            | Missense      | 0  | 4  | 3 | 1 | 1 | 1  | 3  |
| 12           | c.302C>A          | p.Ala101Asp                           | Missense      | 2  | 0  | 0 | 0 | 0 | 0  | 0  |
| 13           | c.305G>A          | p.Arg102Gln                           | Missense      | 0  | 0  | 0 | 1 | 0 | 0  | 1  |
| 14           | c.325G>A          | p.Gly109Arg                           | Missense      | 0  | 0  | 0 | 0 | 0 | 2  | 0  |
| 15           | c.328T>C          | p.Cys110Arg                           | Missense      | 2  | 0  | 0 | 0 | 0 | 0  | 0  |
| 16           | c.331G>A          | p.Ala111Thr                           | Missense      | 0  | 0  | 0 | 0 | 0 | 2  | 0  |
| 17           | c.404G>A          | p.Gly135Glu                           | Missense      | 0  | 0  | 1 | 0 | 0 | 0  | 0  |
| 18           | c.410T>C          | p.Leu137Pro                           | Missense      | 2  | 6  | 2 | 0 | 0 | 0  | 0  |
| 19           | c.421C>T          | p.Arg141Cys                           | Missense      | 3  | 1  | 0 | 0 | 0 | 0  | 0  |
| 20           | c.422G>A          | p.Arg141His                           | Missense      | 6  | 4  | 0 | 0 | 0 | 0  | 0  |
| 21           | c.426T>G          | p.Cys142Trp                           | Missense      | 0  | 1  | 1 | 0 | 0 | 0  | 0  |
| 22           | c.433G>T          | p.Asp145Tyr                           | Missense      | 0  | 0  | 1 | 0 | 0 | 0  | 1  |
| 23           | c.499A>G          | p.Lys167Glu                           | Missense      | 0  | 0  | 0 | 0 | 0 | 0  | 2  |

|                  |          |             |          |    |    |    |   |   |    |    |
|------------------|----------|-------------|----------|----|----|----|---|---|----|----|
| 24               | c.544C>T | p.Arg182Cys | Missense | 1  | 0  | 0  | 0 | 0 | 1  | 2  |
| 25               | c.574C>T | p.Pro192Ser | Missense | 0  | 0  | 2  | 0 | 0 | 2  | 0  |
| 26               | c.577C>T | p.Pro193Ser | Missense | 2  | 0  | 0  | 0 | 0 | 0  | 0  |
| 27               | c.578C>G | p.Pro193Arg | Missense | 0  | 0  | 0  | 0 | 0 | 2  | 0  |
| 28               | c.589C>T | p.Arg197Cys | Missense | 6  | 4  | 1  | 2 | 0 | 0  | 0  |
| 29               | c.590G>A | p.Arg197His | Missense | 9  | 1  | 1  | 0 | 0 | 1  | 0  |
| 30               | c.608C>T | p.Pro203Leu | Missense | 1  | 0  | 0  | 0 | 0 | 0  | 0  |
| 31               | c.617G>C | p.Trp206Ser | Missense | 0  | 0  | 0  | 0 | 0 | 2  | 0  |
| 32               | c.625C>T | p.Arg209Cys | Missense | 4  | 2  | 1  | 0 | 0 | 1  | 1  |
| 33               | c.638G>A | p.Arg213Gln | Missense | 0  | 0  | 2  | 0 | 0 | 0  | 0  |
| 34               | c.647T>C | p.Leu216Pro | Missense | 0  | 4  | 0  | 0 | 1 | 0  | 3  |
| 35               | c.668G>A | p.Cys223Tyr | Missense | 1  | 0  | 0  | 0 | 0 | 0  | 1  |
| Total (139 eyes) |          |             |          | 51 | 31 | 15 | 4 | 9 | 14 | 15 |

A = adenine; Ala = Alanine; Arg = Arginine; Asp = Aspartic acid; C = cytosine; Coys = Cysteine; del = deletion; DS domain = discoidin domain; dup = duplication; fs = frameshift; G = guanine; Gln = Glutamine; Glu = Glutamic acid; Gly = Glycine; His = Histidine ; Leu = Leucine; Lys = Lysine; n = number; Pro = Proline; RS domain = Retinoschisin 1 domain; Ser = Serine; T = thymine; Thr = Threonine; Trp = Tryptophan; Tyr = Tyrosine; Val = Valine

**Supplementary Table S2. Comparison of BCVA, Age, OCT Types Between the Truncating and Missense Variants in X-linked Retinoschisis Patients.**

|                            | <b>Group 1<br/>(Truncating mutation)</b> | <b>Group 2<br/>(Missense mutation)</b> | <b>P-value</b>   |
|----------------------------|------------------------------------------|----------------------------------------|------------------|
| <b>Mean ± SD in logMAR</b> | <b>0.64 ± 0.42</b>                       | <b>0.70 ± 0.39</b>                     | <b>0.692</b>     |
| <b>Mean ± SD in age</b>    | <b>18.43 ± 10.76</b>                     | <b>15.16 ± 9.09</b>                    | <b>0.559</b>     |
| <b>1A (n=51 eyes)</b>      | <b>11 (21.6%)</b>                        | <b>40 (78.4%)</b>                      | <b>0.042</b>     |
| <b>Mean ± SD in logMAR</b> | <b>0.53 ± 0.20</b>                       | <b>0.44 ± 0.18</b>                     | <b>0.233</b>     |
| <b>Mean ± SD in age</b>    | <b>15.76 ± 8.87</b>                      | <b>11.06 ± 5.27</b>                    | <b>0.119</b>     |
| <b>1B (n=31 eyes)</b>      | <b>4 (12.9%)</b>                         | <b>27 (87.1%)</b>                      | <b>0.814</b>     |
| <b>Mean ± SD in logMAR</b> | <b>0.60 ± 0.27</b>                       | <b>0.71 ± 0.34</b>                     | <b>0.479</b>     |
| <b>Mean ± SD in age</b>    | <b>24.73 ± 15.21</b>                     | <b>13.59 ± 6.14</b>                    | <b>0.239</b>     |
| <b>2 (n=15 eyes)</b>       | <b>0 (0.0%)</b>                          | <b>15 (100.0%)</b>                     | <b>&lt;0.001</b> |
| <b>Mean ± SD in logMAR</b> | <b>-</b>                                 | <b>0.77 ± 0.27</b>                     | <b>-</b>         |
| <b>Mean ± SD in age</b>    | <b>-</b>                                 | <b>15.06 ± 6.29</b>                    | <b>-</b>         |
| <b>3 (n=4 eyes)</b>        | <b>0 (0.0%)</b>                          | <b>4 (100.0%)</b>                      | <b>&lt;0.001</b> |
| <b>Mean ± SD in logMAR</b> | <b>-</b>                                 | <b>1.35 ± 0.47</b>                     | <b>-</b>         |
| <b>Mean ± SD in age</b>    | <b>-</b>                                 | <b>13.61 ± 4.92</b>                    | <b>-</b>         |
| <b>4 (n=9 eyes)</b>        | <b>0 (0.0%)</b>                          | <b>9 (100.0%)</b>                      | <b>&lt;0.001</b> |
| <b>Mean ± SD in logMAR</b> | <b>-</b>                                 | <b>1.17 ± 0.44</b>                     | <b>-</b>         |
| <b>Mean ± SD in age</b>    | <b>-</b>                                 | <b>13.29 ± 5.32</b>                    | <b>-</b>         |
| <b>5A (n=14 eyes)</b>      | <b>0 (0.0%)</b>                          | <b>14 (100.0%)</b>                     | <b>&lt;0.001</b> |
| <b>Mean ± SD in logMAR</b> | <b>-</b>                                 | <b>0.48 ± 0.27</b>                     | <b>-</b>         |
| <b>Mean ± SD in age</b>    | <b>-</b>                                 | <b>20.64 ± 14.75</b>                   | <b>-</b>         |
| <b>5B (n=15 eyes)</b>      | <b>1 (6.7%)</b>                          | <b>14 (93.3%)</b>                      | <b>0.535</b>     |
| <b>Mean ± SD in logMAR</b> | <b>2.00 ± 0.00</b>                       | <b>0.96 ± 0.40</b>                     | <b>0.159</b>     |
| <b>Mean ± SD in age</b>    | <b>22.65 ± 0.00</b>                      | <b>26.32 ± 10.52</b>                   | <b>0.908</b>     |

BCVA = best corrected visual acuity; logMAR = logarithm of the minimum angle of resolution; n = number; OCT = optical coherence tomography SD = standard deviation; XLRS = X-linked retinoschisis
